# Supplementary material for: Synergistic effect of Ru nanoclusters on WC1−x anchored on N-doped carbon nanosheets to promote highly efficient alkaline hydrogen evolution
Source: Royal Society of Chemistry journal article supplement (doi:10.1039/d2qi01923j), 2022-11-05
Supplement: d2qi01923j1.pdf [file d2qi01923j1.pdf]

## Support Information

# **Synergistic Effect from Ru Nanoclusters on WC<sub>1-x</sub> Anchored on N-doped Carbon Nanosheet Boosting High-efficient Alkaline Hydrogen Evolution**

Hong Li<sup>a,b</sup>, Lanxin Dai<sup>a</sup>, Yinan Zheng<sup>a</sup>, Hu Yao<sup>a</sup>, Jiayu Bai<sup>a</sup>, Xiaohui Guo<sup>a\*</sup>

<sup>a</sup> Key Lab of Synthetic and Natural Functional Molecule Chemistry of Ministry of Education, and College of Chemistry and Materials Science, Northwest University, Xi'an, 710069, P. R. China.

<sup>b</sup> College of Chemistry and Chemical Engineering, Yan'an University, Yan'an, 716000, P. R. China.

\*Corresponding author E-mail: guoxh2009@nwu.edu.cn, Tel: 86-2981535031

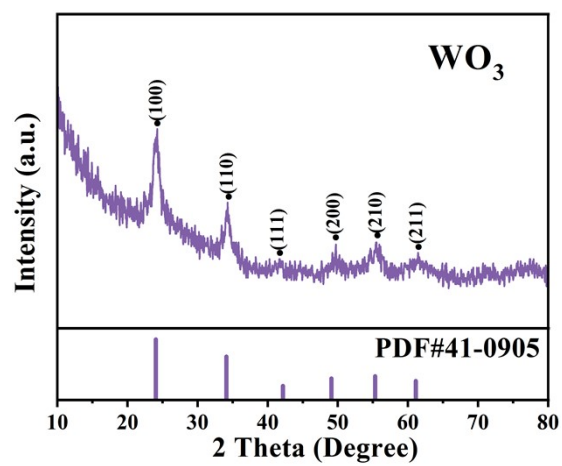

**Figure S1** XRD pattern of the as-synthesized WO<sub>3</sub> nanosheets.

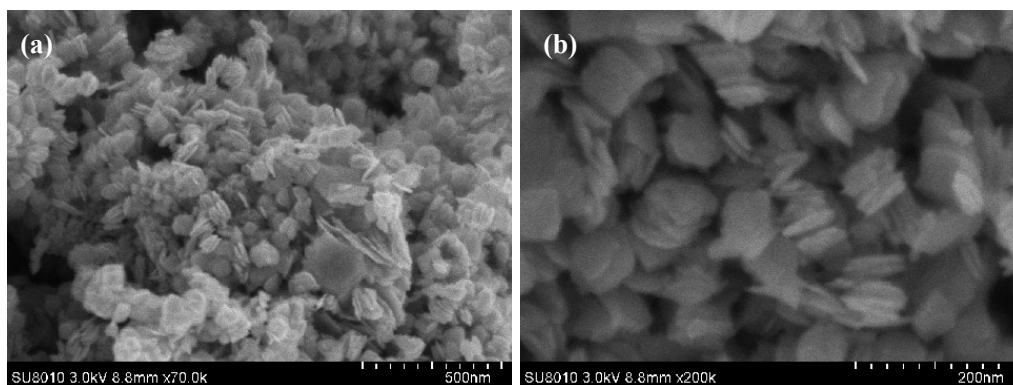

**Figure S2** SEM images of the as-synthesized WO<sub>3</sub> nanosheets.

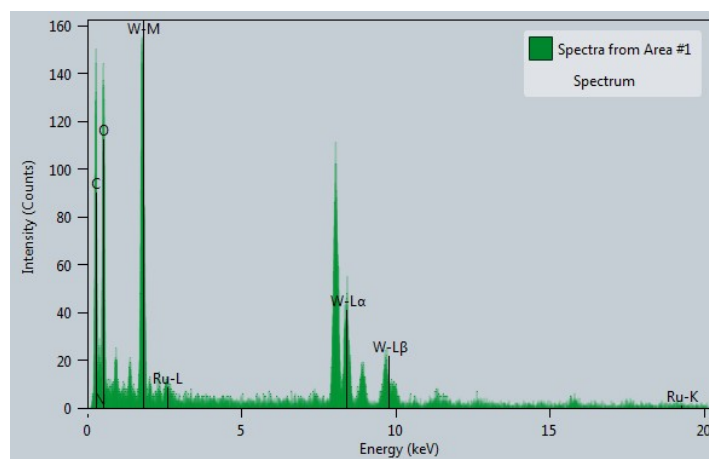

**Figure S3** EDX patterns of the Ru/WC<sub>1-x</sub>@NC hybrid.

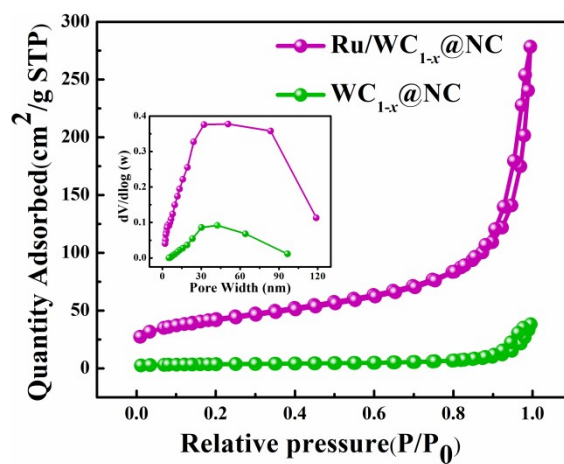

**Figure S4** N<sub>2</sub> adsorption/desorption isotherms of Ru/WC<sub>1-x</sub>@NC (the inset presents the corresponding pore size distribution).

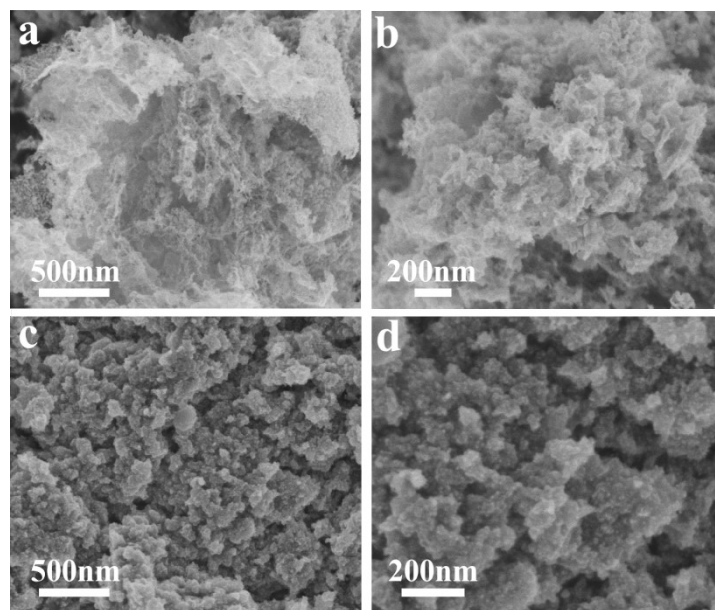

**Figure S5** SEM images of the WC<sub>1-x</sub>@NC (a-b) and Ru@NC (c-d) hybrids.

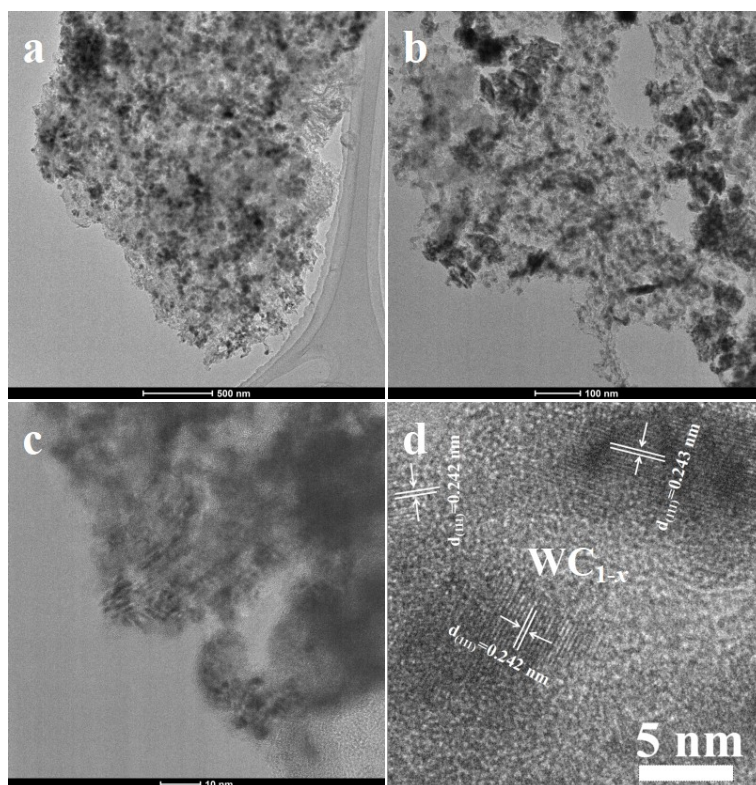

Figure S6 (a-c) TEM and (d) HRTEM images of the as-prepared  $WC_{1-x}@NC$  hybrid.

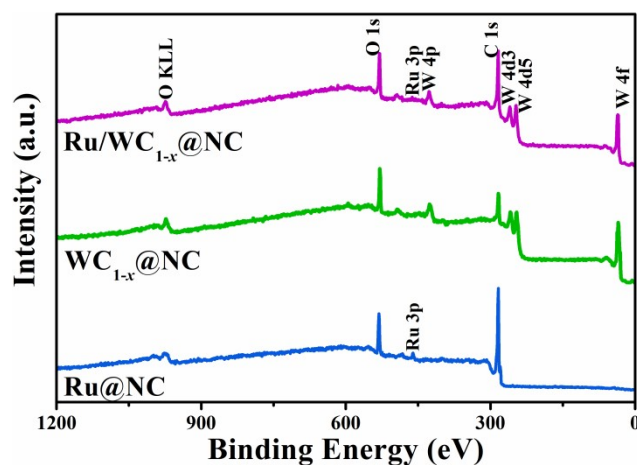

Figure S7 XPS surveys of the as-prepared  $Ru/WC_{1-x}@NC$ ,  $WC_{1-x}@NC$  and  $Ru@NC$  hybrids.

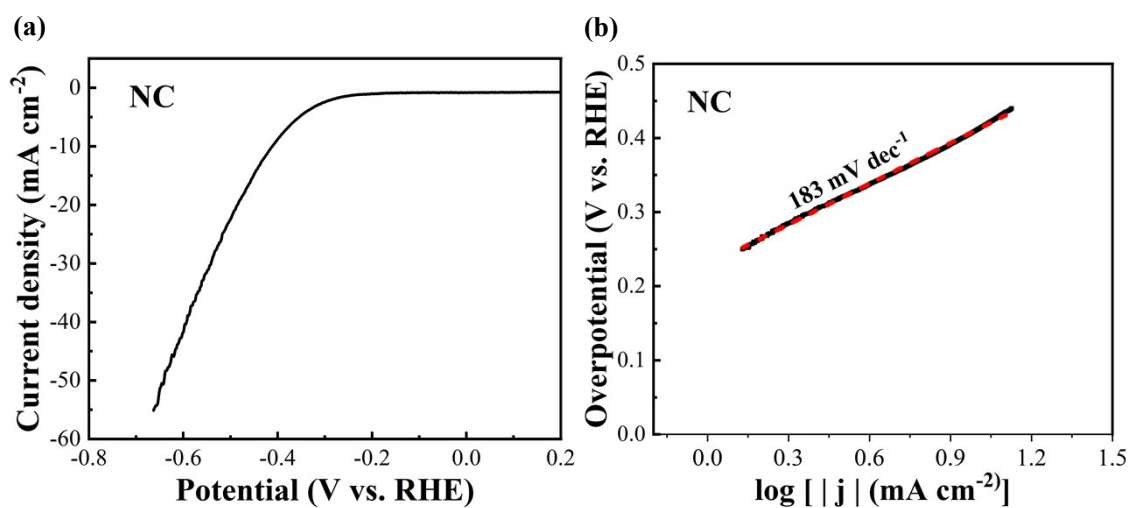

Figure S8 (a) LSV curve and (b) Tafel slope of nitrogen-doped carbon (NC) in 1 M KOH solution.

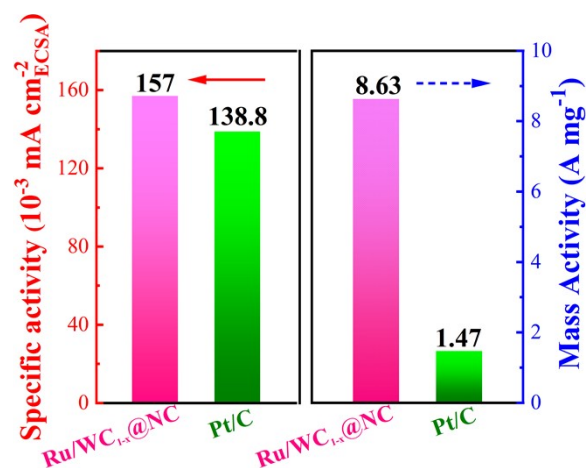

**Figure S9.** Specific activity and Mass activity of Ru/WC<sub>1-x</sub>@NC hybrids at the overpotential of 100 mV, in comparison with the commercial Pt/C (20 wt.%).

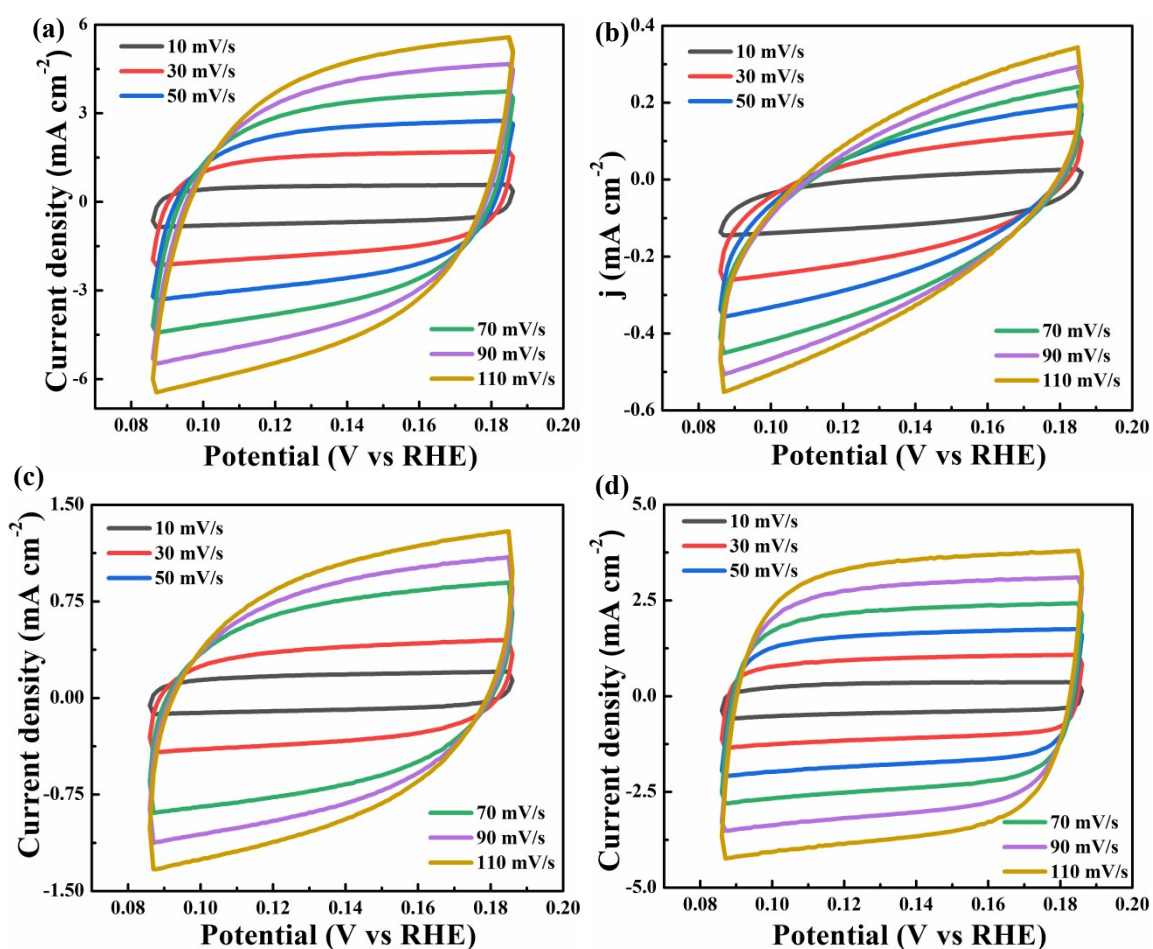



**Figure S10** The CV curves measured at different scan rates in the nonfaradaic potential region (0.085-0.185 V vs. RHE) for (a) Ru/WC<sub>1-x</sub>@NC, (b) WC<sub>1-x</sub>@NC, (c) Ru@NC and (d) commercial Pt/C catalysts in 1 M KOH, respectively.

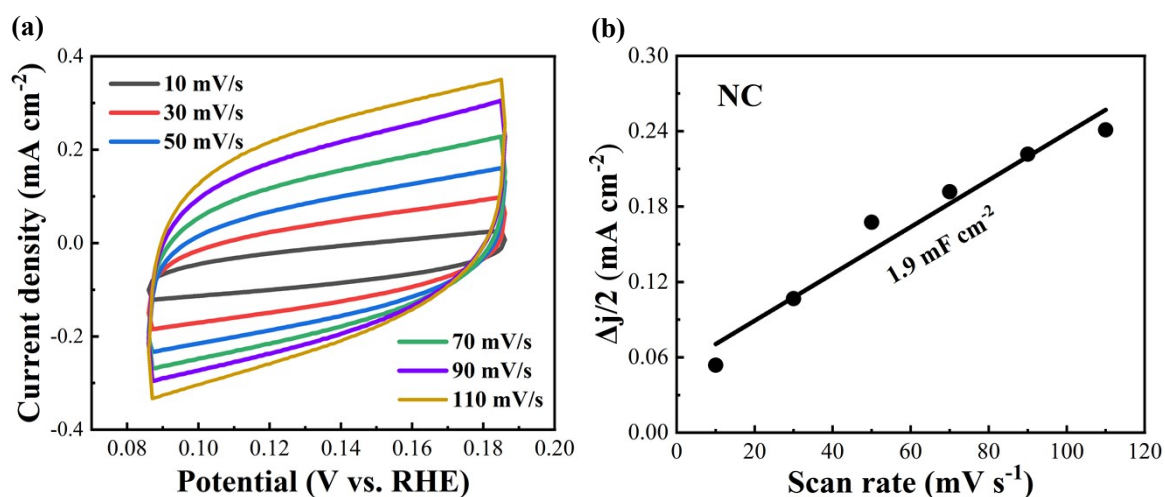

**Figure S11** (a) The CV curves measured at different scan rates in the nonfaradaic potential region (0.085-0.185 V vs. RHE) and (b) the corresponding  $C_{dl}$  curve for NC support in 1 M KOH.

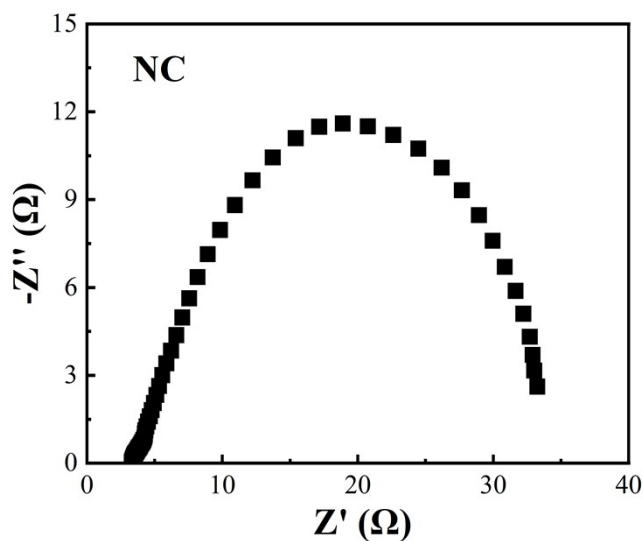

**Figure S12.** Nyquist plots of NC support in 1 M KOH solution.

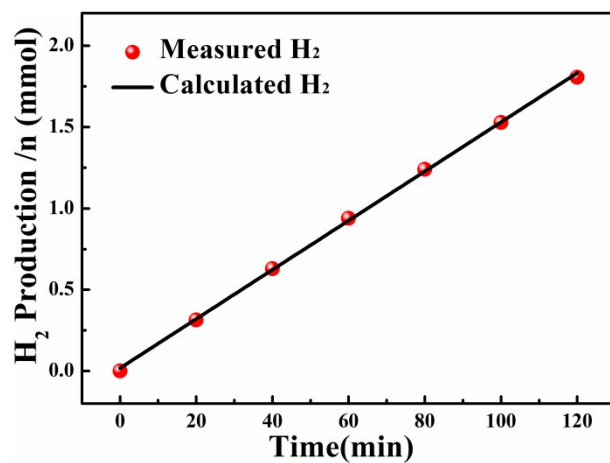

**Figure S13.** Comparison of the calculated and measured H<sub>2</sub> evolution amount of Ru/WC<sub>1-x</sub>@NC hybrid at a period time.

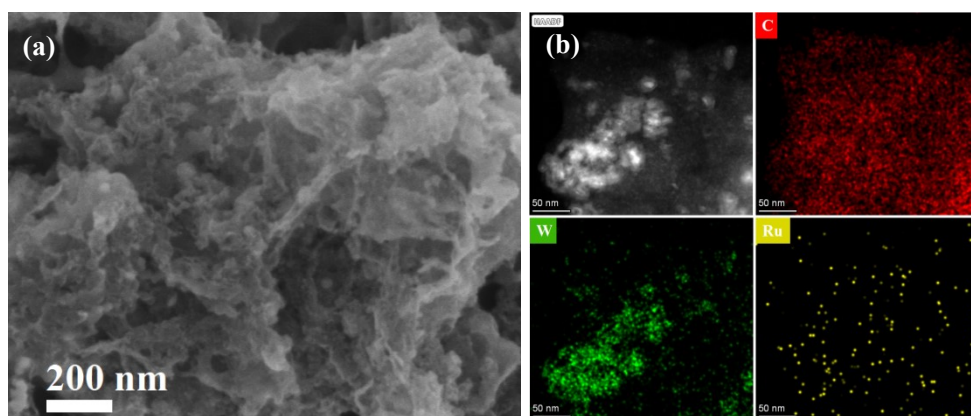

**Figure S14.** (a) SEM image and (b) EDX mapping spectra of Ru/WC<sub>1-x</sub>@NC hybrid after 6000 CV cycles.



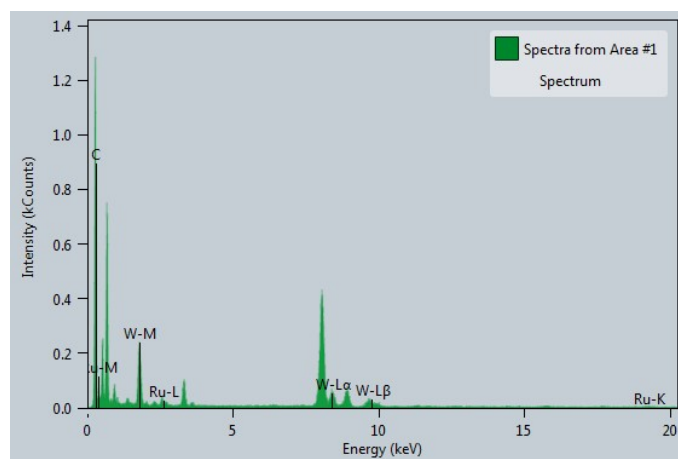

**Figure S15.** EDX patterns of the Ru/WC<sub>1-x</sub>@NC hybrid after 6000 CV cycles.

**Table S1.** Ru content in the as-synthesized Ru/WC<sub>1-x</sub>@NC hybrids measured through ICP-AES.

| Samples                  | Ru content (wt.%) |
|--------------------------|-------------------|
| Ru/WC <sub>1-x</sub> @NC | 2.5               |

**Table S2** Comparison of Ru content in the resulted Ru/WC<sub>1-x</sub>@NC hybrid in this work and the reported Ru-based catalysts in recent years.

| catalysts                             | Ru content wt.% | measurement | Ref.      |
|---------------------------------------|-----------------|-------------|-----------|
| Ru/WC <sub>1-x</sub> /NC              | 2.5             | ICP-AES     | This work |
| Ru <sub>2</sub> P/WO <sub>3</sub> @NP | 3.4             | ICP-AES     | [1]       |
| C                                     |                 |             |           |
| (Ru-Co)O <sub>x</sub>                 | 28.4            | ICP-AES     | [2]       |
| RuCo@NC                               | 3.58            | ICP-AES     | [3]       |
| Pyrite-type RuS <sub>2</sub>          | 14.1            | ICP-OES     | [4]       |
| Ru/Co <sub>3</sub> O <sub>4</sub> NW  | 5.45            | ICP-OES     | [5]       |
| Ru/g-C <sub>3</sub> N <sub>4</sub>    | 20              | TEM-EDS     | [6]       |
| Ru NCs/BNG                            | 14.25           | TGA         | [7]       |
| RuP <sub>2</sub> @NPC                 | 23.3            | ICP-AES     | [8]       |

|        |      |     |     |
|--------|------|-----|-----|
| S-RP/C | 21.4 | TGA | [9] |
|--------|------|-----|-----|

**Table S3** Comparison of HER activity of the resulted Ru/WC<sub>1-x</sub>@NC hybrid in this work with reported WC<sub>1-x</sub>-based or Ru-based electrocatalysts.

| Electrocatalysts                                       | Electrolyte                          | Overpotential<br>( $\eta=10 \text{ mA cm}^{-2}$ ) | Tafel slope                | Ref.      |
|--------------------------------------------------------|--------------------------------------|---------------------------------------------------|----------------------------|-----------|
| Carbon-encapsulated W <sub>2</sub> C@WC <sub>1-x</sub> | 0.5 M H <sub>2</sub> SO <sub>4</sub> | 240 mV                                            | 86 mV dec <sup>-1</sup>    | [10]      |
| Pt(10 wt.%)/WC <sub>1-x</sub> @C                       | 0.5 M H <sub>2</sub> SO <sub>4</sub> | 127 mV                                            | 32 mV dec <sup>-1</sup>    | [11]      |
| W <sub>2</sub> C@WC <sub>1-x</sub> /Mo film            | 0.5 M H <sub>2</sub> SO <sub>4</sub> | 58 mV                                             | 41 mV dec <sup>-1</sup>    | [12]      |
| WC <sub>1-x</sub> nanocrystals                         | 1 M KOH                              | 216 mV                                            | 122.2 mV dec <sup>-1</sup> | [13]      |
| Ru nanoparticles/WSe <sub>2</sub> nanosheets           | 1 M KOH                              | 87 mV                                             | 118 mV dec <sup>-1</sup>   | [14]      |
| Ru nanoparticles/CoO nanorods                          | 1 M KOH                              | 55 mV                                             | 72 mV dec <sup>-1</sup>    | [15]      |
| Ru/TiO <sub>2</sub> -VO@C hybrids                      | 1 M KOH                              | 64 mV                                             | 73 mV dec <sup>-1</sup>    | [16]      |
| Ru nanoparticle/CeO <sub>2</sub> hybrids               | 1 M KOH                              | 28.9 mV                                           | 53.2 mV dec <sup>-1</sup>  | [17]      |
| Ru-doped Mo <sub>2</sub> C nanoparticles/NC            | 1 M KOH                              | 34 mV                                             | 80 mV dec <sup>-1</sup>    | [18]      |
| Ru nanoparticles/N-doped carbon                        | 1 M KOH                              | 32 mV                                             | 53 mV dec <sup>-1</sup>    | [19]      |
| Ru nanoclusters/WC <sub>1-x</sub> nanosheets /NC       | 1 M KOH                              | 24 mV                                             | 45 mV dec <sup>-1</sup>    | This work |

## References:

- [1] X. L. Jiang, H. Jang, S. G. Liu, Z. J. Li, M. G. Kim, C. Li, Q. Qin, X. E. Liu, J. Cho, The heterostructure of Ru<sub>2</sub>P/WO<sub>3</sub>/NPC synergistically promotes H<sub>2</sub>O dissociation for improved hydrogen evolution. *Angew. Chem. Int. Ed.*, 2021, 60, 4110-4116.
- [2] C. Wang, L. M. Qi. Heterostructured inter-doped ruthenium-cobalt oxide hollow nanosheet arrays for highly efficient overall water splitting. *Angew. Chem. Int. Ed.*, 2020, 59, 17219-17224.
- [3] J. W. Su, Y. Yang, G. L. Xia, J. T. Chen, P. Jiang, Q. W. Chen. Ruthenium-cobalt nanoalloys encapsulated in nitrogen-doped graphene as active electrocatalysts for producing hydrogen in alkaline media. *Nat. Commun.*, 2017, 8, 14969.
- [4] Y. J. Xu, C. C. Du, Q. H. Shen, J. L. Huang, X. H. Zhang, J. H. Chen. Well-dispersed pyrite-type RuS<sub>2</sub> nanocrystals anchored on porous nitrogen and sulfur co-doped hollow carbon spheres for enhanced alkaline hydrogen evolution. *Chem. Eng. J.*, 2021, 417, 129318.
- [5] Z. Liu, L. L. Zeng, J. Y. Yu, L. J. Yang, J. Zhang, X. L. Zhang, F. Han, L. L. Zhao, X. Li, H. Liu, W. J. Zhou. Charge redistribution of Ru nanoclusters on Co<sub>3</sub>O<sub>4</sub> porous nanowire via the oxygen regulation for enhanced hydrogen evolution reaction. *Nano Energy*, 2021, 85, 105940.
- [6] D. Z. Li, Y. Liu, J. Yang, C. Q. Hu, L. G. Feng. Electrochemical hydrogen evolution reaction efficiently catalyzed by Ru-N coupling in defect-rich Ru/g-C<sub>3</sub>N<sub>4</sub> nanosheets. *J. Mater. Chem. A*, 2021, 9, 15019-15026.
- [7] S. H. Ye, F. Y. Luo, T. T. Xu, P. Y. Zhang, H. D. Shi, S. Q. Qin, J. P. Wu, C. X. He, X. P. Ouyang,

Q. L. Zhang, J. L. Liu, X. L. Sun. Boosting the alkaline hydrogen evolution of Ru nanoclusters anchored on B/N-doped graphene by accelerating water dissociation. *Nano Energy*, 2020, 68,104301.

[8] Z. H. Pu, I. S. Amiin, Z. K. Kou, W. Q. Li, S. S. Mu. RuP<sub>2</sub>-based catalysts with platinum-like activity and higher durability for the hydrogen evolution reaction at all pH values. *Angew. Chem.* 2017, 129, 11717-11722.

[9] J. Yu, Y. A. Guo, S. X. She, S. S. Miao, M. Ni, W. Zhou, M. L. Liu, Z. P. Shao. Bigger is surprisingly better: agglomerates of larger RuP nanoparticles outperform benchmark Pt nanocatalysts for the hydrogen evolution reaction. *Adv. Mater.*, 2018, 30, 1800047.

[10] I. Kim, S. -W. Park, D. -W. Kim. Carbon-encapsulated multi-phase nanocomposite of W<sub>2</sub>C@WC<sub>1-x</sub> as a highly active and stable electrocatalyst for hydrogen generation. *Nanoscale*, 2018, 10, 21123-21131.

[11] I. Shanenkov, A. Ivashutenko, Y. Shanenkova, D. Nikitin, Y. K. Zhu, J. Z. Li, W. Han, A. Sivkov. Composite material WC<sub>1-x</sub>@C as a noble-metal-economic material for hydrogen evolution reaction. *J. Alloy. Compd.*, 2020, 834, 155116.

[12] S. S. Xu, L. Q. Yang, Y. -Z. Liu, Y. Hua, X. M. Gao, A. Neville. Boosting hydrogen evolution performance by using a plasma-sputtered porous monolithic W<sub>2</sub>C@WC<sub>1-x</sub>/Mo film electrocatalyst. *J. Mater. Chem. A*, 2020, 8, 19473-19483.

[13] R. Tong, Y. J. Qu, Q. Zhu, X. N. Wang, Y. H. Lu, S. P. Wang, H. Pan. Combined experimental and theoretical assessment of WX<sub>y</sub> (X = C, N, S, P) for Hydrogen evolution reaction. *ACS Appl. Energy Mater.* 2020, 3, 1082-1088.

- [14] Y. M. Zhao, G. X. Mao, C. Z. Huang, P. Cai, G. Z. Cheng, W. Luo. Decorating WSe<sub>2</sub> nanosheets with ultrafine Ru nanoparticles for boosting electrocatalytic hydrogen evolution in alkaline electrolytes. *Inorg. Chem. Front.*, 2019, 6, 1382-1387.
- [15] J. -X. Guo, D. -Y. Yan, K. -W. Qiu, C. Mu, D. Jiao, J. Mao, H. Wang, T. Ling. High electrocatalytic hydrogen evolution activity on a coupled Ru and CoO hybrid electrocatalyst. *J. Energy. Chem.*, 2019, 37, 143-147.
- [16] Z. Z. Wei, Z. J. Zhao, J. Wang, Q. Zhou, C. X. Zhao, Z. H. Yao, J. G. Wang. Oxygen-deficient TiO<sub>2</sub> and carbon coupling synergistically boost the activity of Ru nanoparticles for the alkaline hydrogen evolution reaction. *J. Mater. Chem. A*, 2021, 9, 10160-10168.
- [17] W. Wang, Y. R. Tao, X. C. Wu, L. J. Yang. Flower-like CeO<sub>2</sub>-supported small-sized Ru nanoparticle hybrids for highly efficient alkaline hydrogen evolution: Roles of interfacial effects. *Appl. Surf. Sci.*, 2022, 581, 152256.
- [18] J. D. Chen, C. H. Chen, Y. Z. Chen, H. Y. Wang, S. J. Mao, Y. Wang. Improving alkaline hydrogen evolution reaction kinetics on molybdenum carbide: Introducing Ru dopant. *J. Catal.*, 2020, 392, 313-321.
- [19] J. Wang, Z. Z. Wei, S. J. Mao, H. R. Li, Y. Wang. Highly uniform Ru nanoparticles over N-doped carbon: pH and temperature-universal hydrogen release from water reduction. *Energy Environ. Sci.*, 2018, 11, 800-806.
